# Supplementary material for: Thyroid cancer 1 (C8orf4) shows high expression, no mutation and reduced methylation level in lung cancers, and its expression correlates with β-catenin and DNMT1 expression and poor prognosis
Source: PubMed Central journal article supplement (PMC5609888; doi:10.18632/oncotarget.16877), 2017-04-06
Supplement: oncotarget-08-62880-s001.pdf [file oncotarget-08-62880-s001.pdf]

## **Thyroid cancer 1 (C8orf4) shows high expression, no mutation and reduced methylation level in lung cancers, and its expression correlates with $\beta$ -catenin and DNMT1 expression and poor prognosis**

### **SUPPLEMENTARY TABLE**

**Supplementary Table 1: The correlations among the expressions of TC1, DNMT1,  $\beta$ -catenin, TCF4, Axin, Dab2, and Chibby.**

**See Supplementary File 1**
